# Supplementary material for: Chronic Illness, Nutritional Status, and Factors Associated with Malnutrition among Various Age Groups Residing in Urban Areas of Telangana and Rural Areas of Andhra Pradesh
Source: MDPI journal article supplement (doi:10.3390/nu15204470), 2023-10-22
Supplement: s1 [file s1]

Table-S1: Information criterion values for the logistic and mixed effect logistic regression analysis for factors associated with stunting among under-five children, thinness among 5-19 years, obesity among adults (19-59 years) using the data from urban and rural areas in south India

|                                         | Stunting |       | Thinness |        | Obesity |        |
|-----------------------------------------|----------|-------|----------|--------|---------|--------|
|                                         | AIC      | BIC   | AIC      | BIC    | AIC     | BIC    |
| <b>Logistic regression</b>              | 652.5    | 720.4 | 1114.1   | 1181.9 | 4542.2  | 4683.4 |
| <b>Mixed effect logistic regression</b> | 643.5    | 715.7 | 1094.2   | 1166.9 | 4508.2  | 4655.5 |

Table-S2: Factors associated with stunting among under-five children, thinness among 5-19 years, obesity among adults (19-59 years) through a univariate mixed-effect logistic regression analysis using the data from urban and rural areas in south India

| Variable                  | Category | Under 5 children        |                     |                       |         | 5 - 19 Years            |                     |                       |         | Adult (>19<60 years)     |                         |                       |         |
|---------------------------|----------|-------------------------|---------------------|-----------------------|---------|-------------------------|---------------------|-----------------------|---------|--------------------------|-------------------------|-----------------------|---------|
|                           |          | Stunting                |                     | OR<br>(95% CI)        | p-value | Thinness                |                     | OR<br>(95% CI)        | p-value | Obese                    |                         | OR<br>(95% CI)        | p-value |
|                           |          | Yes<br>(N=174)<br>n (%) | No (N=343)<br>n (%) |                       |         | Yes<br>(N=277)<br>n (%) | No (N=669)<br>n (%) |                       |         | Yes<br>(N=1630)<br>n (%) | No<br>(N=1807)<br>n (%) |                       |         |
| <b>Place of residence</b> | Urban    | 143 (82.2)              | 280 (81.6)          | 1.09<br>(0.52 – 2.29) | 0.827   | 254 (91.7)              | 547 (81.8)          | 3.43<br>(1.72 – 6.84) | <0.001* | 1235 (75.8)              | 1356 (75)               | 1.03<br>(0.84 – 1.26) | 0.782   |
|                           | Rural    | 31 (17.8)               | 63 (18.4)           | Ref                   | –       | 23 (8.3)                | 122 (18.2)          | Ref                   | –       | 395 (24.2)               | 451 (25)                | Ref                   | –       |
| <b>Age group in years</b> | 0 – 2    | 89 (51.1)               | 132 (38.5)          | 2.06<br>(1.19 – 3.57) | 0.010*  | –                       | –                   | –                     | –       | –                        | –                       | –                     | –       |
|                           | 3 – 5    | 85 (48.9)               | 211 (61.5)          | Ref                   | –       | –                       | –                   | –                     | –       | –                        | –                       | –                     | –       |
|                           | 5 – 9    | –                       | –                   | –                     | –       | 81 (29.2)               | 183 (27.4)          | Ref                   | –       | –                        | –                       | –                     | –       |
|                           | 10 – 14  | –                       | –                   | –                     | –       | 95 (34.3)               | 213 (31.8)          | 1.00<br>(0.61 - 1.66) | 0.985   | –                        | –                       | –                     | –       |
|                           | 15 – 19  | –                       | –                   | –                     | –       | 101 (36.5)              | 273 (40.8)          | 0.84<br>(0.51 - 1.39) | 0.497   | –                        | –                       | –                     | –       |
|                           | 20 – 39  | –                       | –                   | –                     | –       | –                       | –                   | –                     | –       | 865 (53.1)               | 1212 (67.1)             | Ref                   | –       |
|                           | 40 – 59  | –                       | –                   | –                     | –       | –                       | –                   | –                     | –       | 765 (46.9)               | 595 (32.9)              | 2.09<br>(1.75 - 2.48) | <0.001* |
| <b>Gender</b>             | Male     | 95 (54.6)               | 172 (50.1)          | 1.40<br>(0.79 - 2.47) | 0.245   | 188 (67.9)              | 321 (48)            | 2.73<br>(1.83 - 4.08) | <0.001* | 521 (32)                 | 663 (36.7)              | 0.78<br>(0.66 - 0.92) | 0.003*  |
|                           | Female   | 79 (45.4)               | 171 (49.9)          | Ref                   | –       | 89 (32.1)               | 348 (52)            | Ref                   | –       | 1108 (68)                | 1142 (63.3)             | Ref                   | –       |

|                                          |                                                                                        |            |            |                        |        |            |            |                       |        |             |             |                       |         |
|------------------------------------------|----------------------------------------------------------------------------------------|------------|------------|------------------------|--------|------------|------------|-----------------------|--------|-------------|-------------|-----------------------|---------|
| Religion                                 | Hindu                                                                                  | 139 (79.9) | 259 (75.7) | Ref                    | –      | 225 (81.5) | 557 (83.3) | Ref                   | –      | 1327 (81.5) | 1555 (86.2) | Ref                   | –       |
|                                          | Muslim                                                                                 | 19 (10.9)  | 54 (15.8)  | 0.50<br>(0.20 - 1.23)  | 0.133  | 36 (13.1)  | 73 (10.9)  | 1.41<br>(0.71 - 2.78) | 0.321  | 203 (12.5)  | 151 (8.4)   | 1.81<br>(1.36 - 2.42) | <0.001* |
|                                          | Christianity                                                                           | 16 (9.2)   | 29 (8.5)   | 1.29<br>(0.45 - 3.73)  | 0.641  | 15 (5.4)   | 39 (5.8)   | 0.89<br>(0.35 - 2.27) | 0.810  | 99 (6.1)    | 97 (5.4)    | 1.21<br>(0.83 - 1.76) | 0.330   |
|                                          | Own                                                                                    | 103 (59.2) | 225 (65.6) | Ref                    | –      | 172 (62.1) | 448 (67)   | Ref                   | –      | 1202 (73.7) | 1212 (67.1) | Ref                   | –       |
|                                          | Rented/leased/others                                                                   | 71 (40.8)  | 118 (34.4) | 1.53<br>(0.84 - 2.81)  | 0.166  | 105 (37.9) | 221 (33)   | 1.33<br>(0.84 - 2.10) | 0.220  | 428 (26.3)  | 595 (32.9)  | 0.68<br>(0.56 - 0.82) | <0.001* |
| Type of family                           | Nuclear                                                                                | 111 (63.8) | 187 (54.5) | Ref                    | –      | 213 (76.9) | 491 (73.4) | Ref                   | –      | 1106 (67.9) | 1265 (70)   | Ref                   | –       |
|                                          | Extended/three generation family                                                       | 48 (27.6)  | 123 (35.9) | 0.54<br>(0.28 - 1.04)  | 0.065  | 60 (21.7)  | 160 (23.9) | 0.83<br>(0.49 - 1.40) | 0.486  | 408 (25)    | 441 (24.4)  | 1.07<br>(0.87 - 1.31) | 0.526   |
|                                          | Joint                                                                                  | 15 (8.6)   | 33 (9.6)   | 0.65<br>(0.23 - 1.84)  | 0.413  | 4 (1.4)    | 18 (2.7)   | 0.40<br>(0.08 - 1.92) | 0.251  | 116 (7.1)   | 101 (5.6)   | 1.37<br>(0.94 – 2.00) | 0.104   |
| Type of house                            | Pucca                                                                                  | 105 (60.3) | 251 (73.2) | Ref                    | –      | 173 (62.5) | 416 (62.2) | Ref                   | –      | 1157 (71)   | 1190 (65.9) | Ref                   | –       |
|                                          | Mixed                                                                                  | 61 (35.1)  | 84 (24.5)  | 2.48<br>(1.21 - 5.07)  | 0.013* | 100 (36.1) | 234 (35)   | 1.08<br>(0.68 - 1.71) | 0.746  | 443 (27.2)  | 557 (30.8)  | 0.79<br>(0.65 – 0.96) | 0.017*  |
|                                          | Kutcha                                                                                 | 8 (4.6)    | 8 (2.3)    | 4.28<br>(0.81 - 22.49) | 0.086  | 4 (1.4)    | 19 (2.8)   | 0.37<br>(0.07 - 1.91) | 0.234  | 30 (1.8)    | 60 (3.3)    | 0.43<br>(0.24 - 0.75) | 0.003*  |
| Overcrowding                             | Not overcrowded                                                                        | 49 (28.2)  | 121 (35.3) | Ref                    | –      | 74 (26.7)  | 243 (36.3) | Ref                   | –      | 908 (55.7)  | 875 (48.4)  | Ref                   | –       |
|                                          | Overcrowded                                                                            | 125 (71.8) | 222 (64.7) | 1.67<br>(0.88 - 3.16)  | 0.114  | 203 (73.3) | 426 (63.7) | 1.93<br>(1.19 - 3.12) | 0.008* | 722 (44.3)  | 932 (51.6)  | 0.71<br>(0.60 - 0.84) | <0.001* |
| Place of cooking                         | Separate kitchen                                                                       | 82 (47.1)  | 182 (53.1) | Ref                    | –      | 139 (50.2) | 337 (50.4) | Ref                   | –      | 859 (52.7)  | 807 (44.7)  | Ref                   | –       |
|                                          | No separate kitchen                                                                    | 92 (52.9)  | 161 (46.9) | 1.48<br>(0.82 - 2.67)  | 0.193  | 138 (49.8) | 332 (49.6) | 1.03<br>(0.67 - 1.59) | 0.899  | 771 (47.3)  | 1000 (55.3) | 0.68<br>(0.58 - 0.81) | <0.001* |
| Cooking fuel                             | Gas                                                                                    | 165 (94.8) | 334 (97.4) | Ref                    | –      | 271 (97.8) | 646 (96.6) | Ref                   | –      | 1598 (98)   | 1719 (95.1) | Ref                   | –       |
|                                          | Firewood/others                                                                        | 9 (5.2)    | 9 (2.6)    | 2.91<br>(0.64 - 13.29) | 0.168  | 6 (2.2)    | 23 (3.4)   | 0.60<br>(0.16 - 2.32) | 0.463  | 32 (2)      | 88 (4.9)    | 0.33<br>(0.20 - 0.55) | <0.001* |
| Source of water for drinking and cooking | Piped water into residence/<br>/Buying water with cans/<br>Water purifier in the house | 161 (92.5) | 310 (90.4) | Ref                    | –      | 268 (96.8) | 615 (91.9) | Ref                   | –      | 1442 (88.5) | 1559 (86.3) | Ref                   | –       |
|                                          | Public tap /Public well/bore/well on residence/plot                                    | 13 (7.5)   | 33 (9.6)   | 0.55<br>(0.18 - 1.65)  | 0.283  | 9 (3.2)    | 54 (8.1)   | 0.29<br>(0.11 - 0.80) | 0.016* | 188 (11.5)  | 248 (13.7)  | 0.80<br>(0.61 – 1.04) | 0.090   |

|                                         |                                                                          |            |            |                       |        |            |            |                       |        |             |             |                        |         |
|-----------------------------------------|--------------------------------------------------------------------------|------------|------------|-----------------------|--------|------------|------------|-----------------------|--------|-------------|-------------|------------------------|---------|
| <b>Most common method of defecation</b> | Use Toilet at Home                                                       | 139 (79.9) | 275 (80.2) | Ref                   | –      | 256 (92.4) | 618 (92.4) | Ref                   | –      | 1549 (95)   | 1664 (92.1) | Ref                    | –       |
|                                         | Public / Community/Shared Toilet                                         | 5 (2.9)    | 10 (2.9)   | 0.98<br>(0.19 – 5.02) | 0.981  | 10 (3.6)   | 20 (3)     | 1.23<br>(0.35 - 4.29) | 0.748  | 33 (2)      | 47 (2.6)    | 0.74<br>(0.42 - 1.30)  | 0.296   |
|                                         | Open Field                                                               | 30 (17.2)  | 58 (16.9)  | 0.98<br>(0.47 – 2.04) | 0.949  | 11 (4)     | 31 (4.6)   | 1.01<br>(0.36 - 2.86) | 0.982  | 48 (2.9)    | 96 (5.3)    | 0.47<br>(0.30 - 0.74)  | 0.001*  |
| <b>Method of garbage disposal</b>       | Panchayat/corporation garbage disposal services/Garbage dump/public pits | 150 (86.2) | 298 (86.9) | Ref                   | –      | 262 (94.6) | 593 (88.6) | Ref                   | –      | 1394 (85.5) | 1510 (83.6) | Ref                    | –       |
|                                         | Drainage/ Vacant/abandoned house/ Burning                                | 13 (7.5)   | 23 (6.7)   | 1.22<br>(0.39 - 3.80) | 0.726  | 5 (1.8)    | 37 (5.6)   | 0.22<br>(0.06 - 0.77) | 0.018* | 158 (9.7)   | 164 (9.1)   | 1.04<br>(0.77 - 1.40)  | 0.791   |
|                                         | No designated place                                                      | 11 (6.3)   | 22 (6.4)   | 0.93<br>(0.29 - 2.95) | 0.896  | 10 (3.6)   | 39 (5.8)   | 0.53<br>(0.19 - 1.49) | 0.230  | 78 (4.8)    | 133 (7.4)   | 0.59<br>(0.41 - 0.85)  | 0.005*  |
| <b>Occupation code</b>                  | Professional/ Semi-professional                                          | –          | –          | –                     | –      | –          | 1 (0.1)    | –                     | –      | 43 (2.6)    | 50 (2.8)    | 1.09<br>(0.63 - 1.87)  | 0.767   |
|                                         | Clerk/ Skilled works/ Semi-skilled works                                 | –          | –          | –                     | –      | 9 (3.2)    | 23 (3.4)   | 0.26<br>(0.02 - 3.40) | 0.307  | 1259 (77.2) | 1203 (66.6) | 1.44<br>(1.13 - 1.84)  | 0.003*  |
|                                         | Unskilled worker                                                         | –          | –          | –                     | –      | 3 (1.2)    | 3 (0.4)    | Ref                   | –      | 193 (11.8)  | 262 (14.5)  | Ref                    | –       |
|                                         | Unemployed                                                               | –          | –          | –                     | –      | 2 (0.7)    | 7 (1.1)    | 0.16<br>(0.01 - 3.93) | 0.262  | 43 (2.6)    | 81 (4.5)    | 0.69<br>(0.42 - 1.13)  | 0.140   |
|                                         | Student/Preschool                                                        | –          | –          | –                     | –      | 263 (94.9) | 635 (95)   | 0.25<br>(0.02 - 2.56) | 0.241  | 92 (5.6)    | 211 (11.7)  | 0.47<br>(0.33 - 0.69)  | <0.001* |
| <b>Literate (age&gt; 7 years)</b>       | Illiterate                                                               | –          | –          | –                     | –      | –          | –          | –                     | –      | 377 (23.1)  | 395 (21.9)  | Ref                    | –       |
|                                         | Read                                                                     | –          | –          | –                     | –      | –          | –          | –                     | –      | 14 (0.9)    | 13 (0.7)    | 1.07<br>(0.42 - 2.76)  | 0.888   |
|                                         | Read & Write                                                             | –          | –          | –                     | –      | –          | –          | –                     | –      | 1237 (75.9) | 1398 (77.4) | 0.86<br>(0.71 – 1.04)  | 0.129   |
|                                         | Preschool/Balwadi School                                                 | –          | –          | –                     | –      | –          | –          | –                     | –      | 2 (0.1)     | 1 (0.1)     | 2.46<br>(0.14 - 43.57) | 0.539   |
| <b>Wealth Index</b>                     | Lowest                                                                   | 101 (58)   | 148 (43.1) | 4.10<br>(1.83 - 9.17) | 0.001* | 148 (53.4) | 317 (47.3) | 1.43<br>(0.84 - 2.43) | 0.185  | 587 (36)    | 880 (48.7)  | 0.45<br>(0.37 - 0.55)  | <0.001* |
|                                         | Middle                                                                   | 42 (24.2)  | 75 (21.9)  | 3.23<br>(1.33 - 7.87) | 0.010* | 61 (22.1)  | 169 (25.3) | 0.94<br>(0.50 - 1.74) | 0.833  | 393 (24.1)  | 424 (23.5)  | 0.67<br>(0.53 - 0.84)  | 0.001*  |
|                                         | Highest                                                                  | 31 (17.8)  | 120 (35)   | Ref                   | –      | 68 (24.5)  | 183 (27.4) | Ref                   | –      | 650 (39.9)  | 503 (27.8)  | Ref                    | –       |

\*Significant at P – value < 0.05.
